# Supplementary material for: Nrf2 contributes to the weight gain of mice during space travel
Source: PubMed Central journal article supplement (PMC7479603; doi:10.1038/s42003-020-01227-2), 2020-09-08
Supplement: 42003_2020_1227_MOESM1_ESM.pdf [file 42003_2020_1227_MOESM1_ESM.pdf]

## Supplementary Figure 1

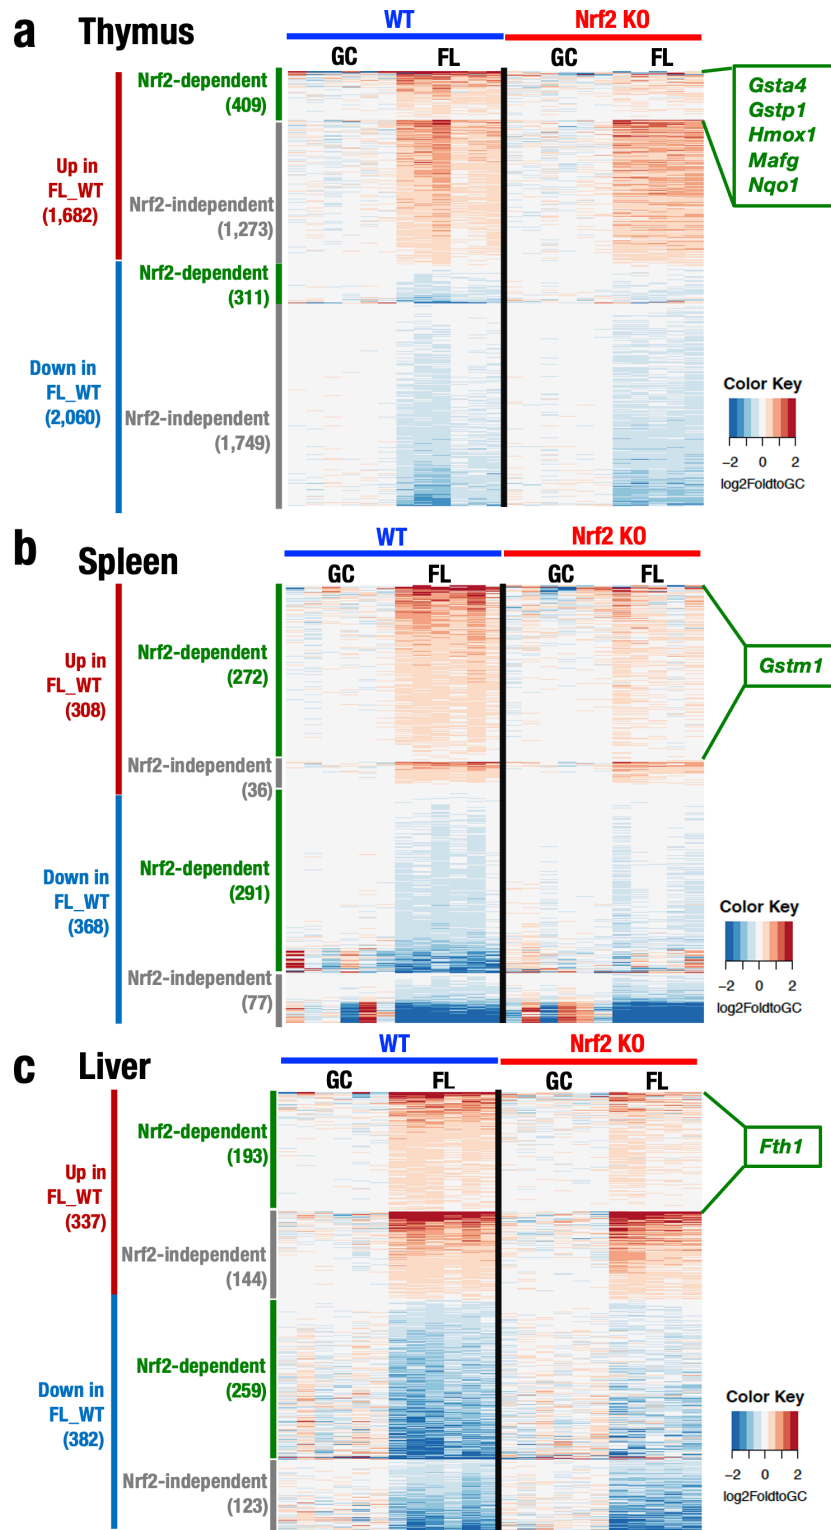

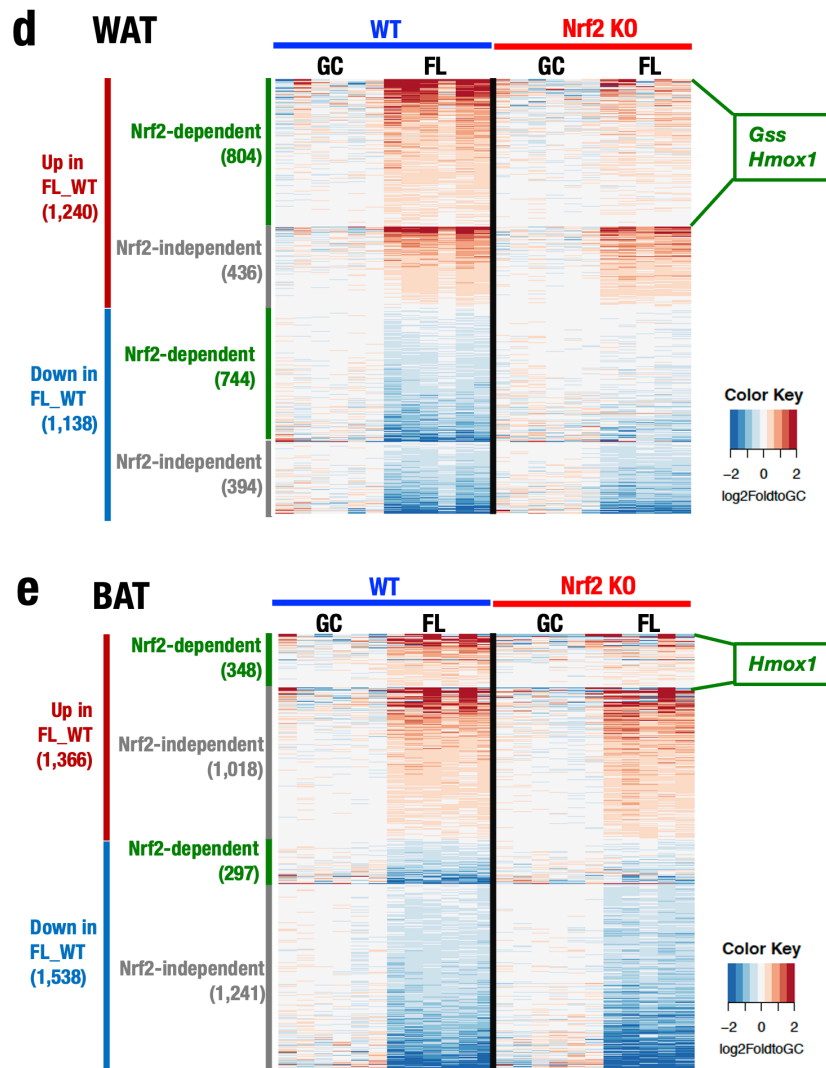

**Supplementary Figure 1.** Classification of space-induced changes of gene expression ( $p < 0.05$ ) into Nrf2-dependent group and Nrf2-independent group by comparing GC Nrf2KO with FL Nrf2-KO in thymus (a), spleen (b), liver (c), WAT (d) and BAT (e). Values of GC WT and GC Nrf2KO are set as 0.  $n=6$  for GC WT, FL WT and GC KO, and  $n=5$  for FL KO.



## Supplementary Figure 2

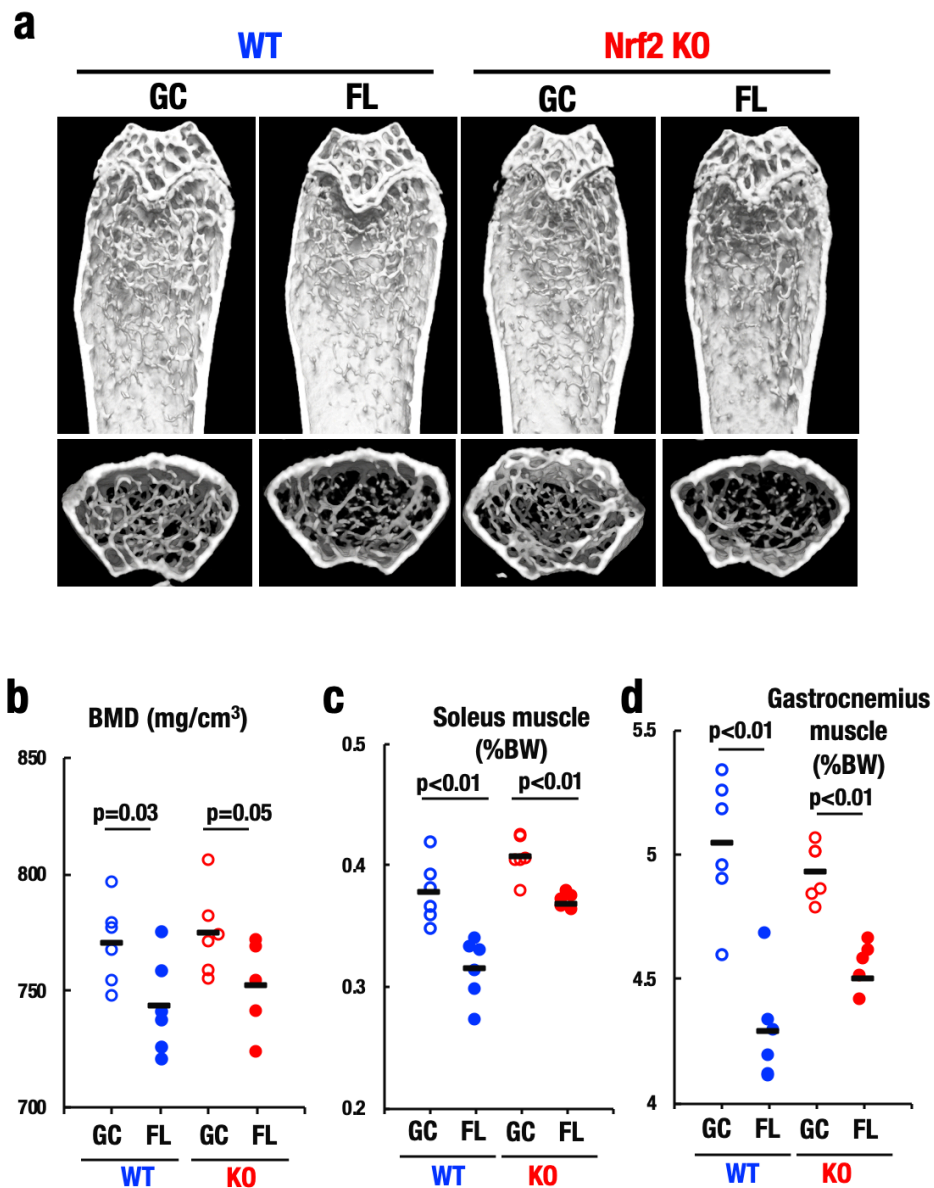

**Supplementary Figure 2.** (a) Representative microCT images of the femur of WT and Nrf2-KO mice in GC and FL groups (Upper: longitudinal view; Lower: axial view of the metaphyseal region). (b) Bone mineral density (BMD) of the femurs of WT and Nrf2-KO mice in GC and FL groups. (c,d) Body weight-normalized masses of soleus muscle (c) and gastrocnemius muscle (d). Data are presented as mean, and dots represent individual animals.  $n=6$  for GC WT, FL WT and GC KO, and  $n=5$  for FL KO. One-way ANOVA with Tukey-Kramer test.

Supplementary Figure 3

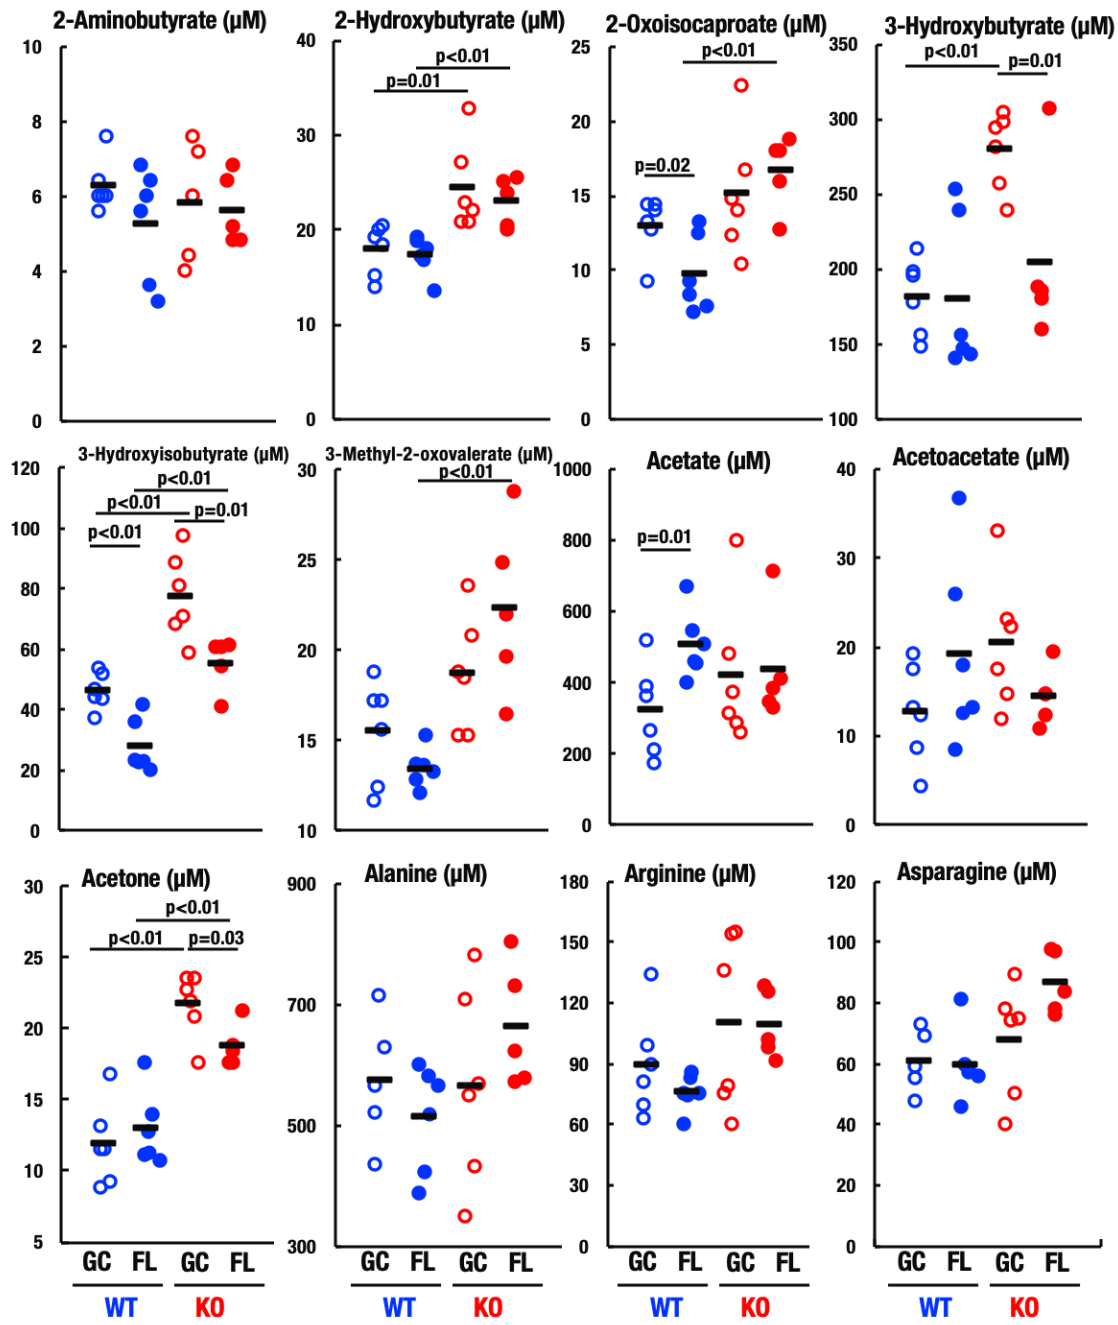

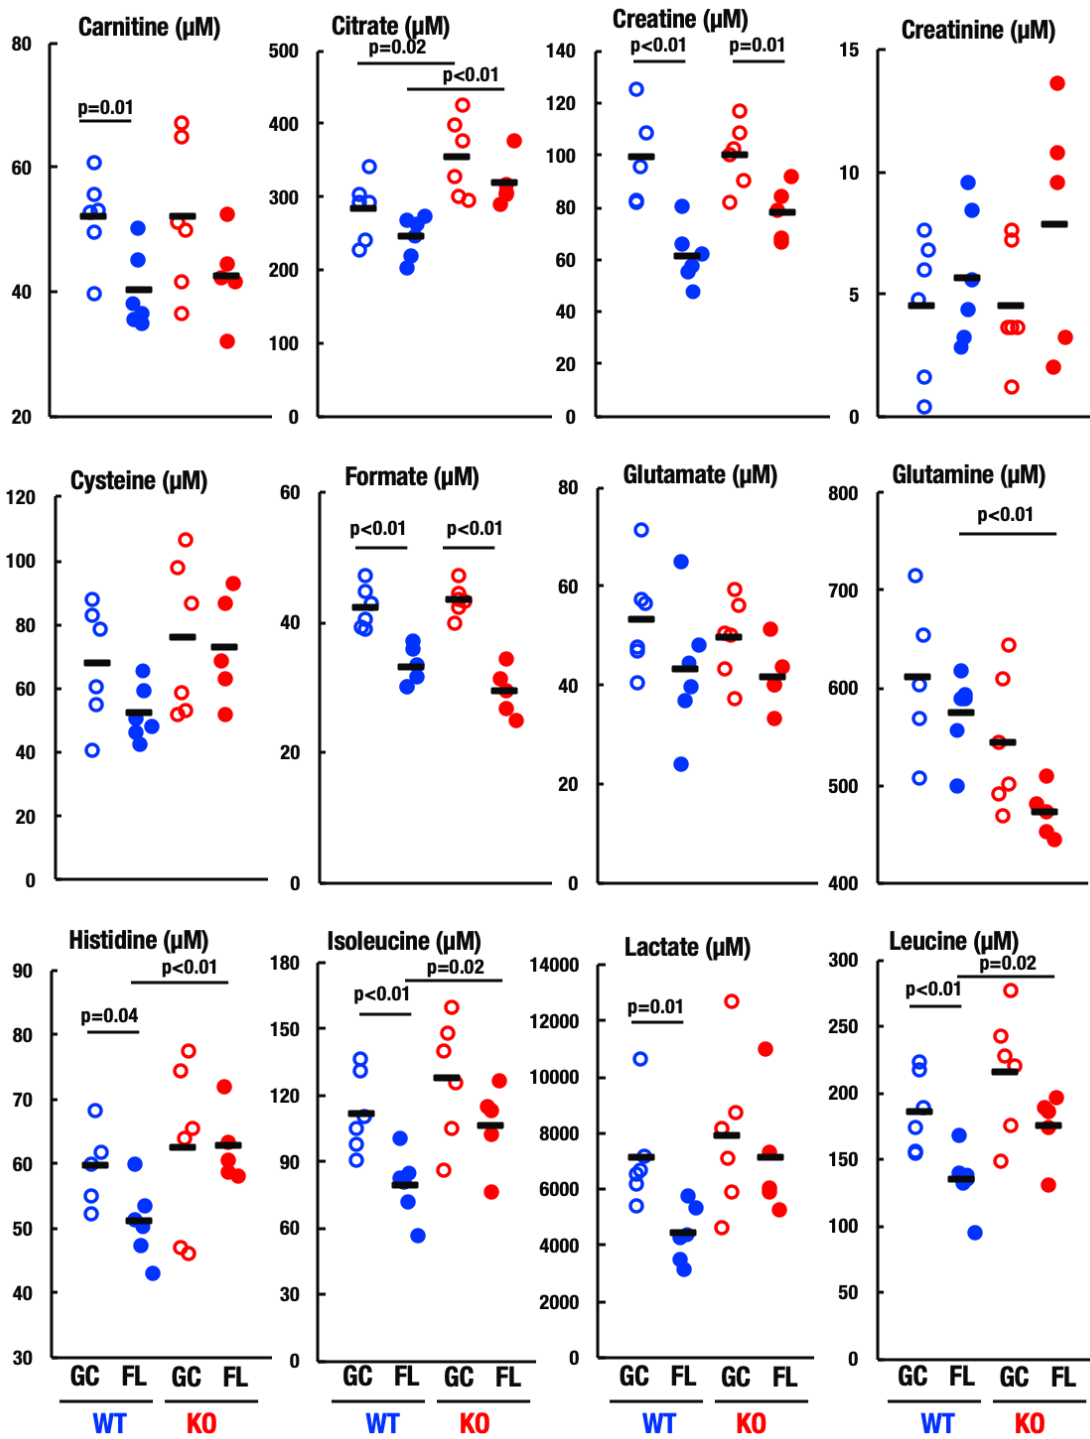

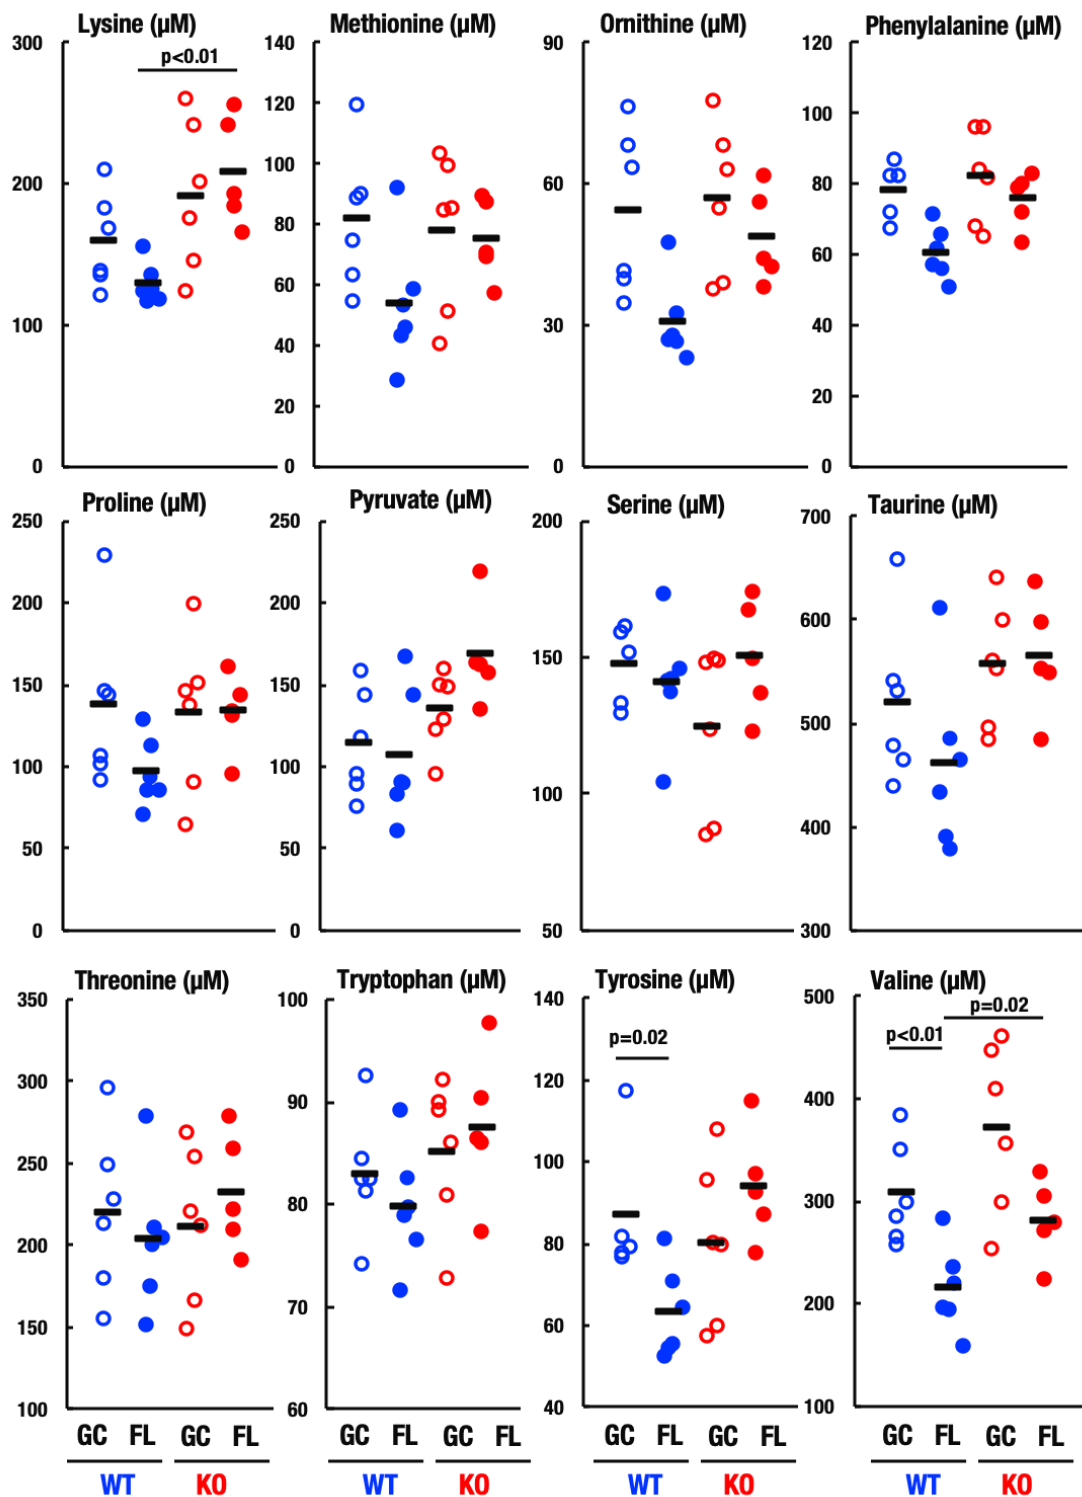

**Supplementary Figure 3.** Levels of plasma metabolites examined by NMR-based metabolome analyses. Data are presented as mean, and dots represent individual animals.  $n=6$  for GC WT, FL WT and GC KO, and  $n=5$  for FL KO. One-way ANOVA with Tukey-Kramer test.

### Supplementary Figure 4

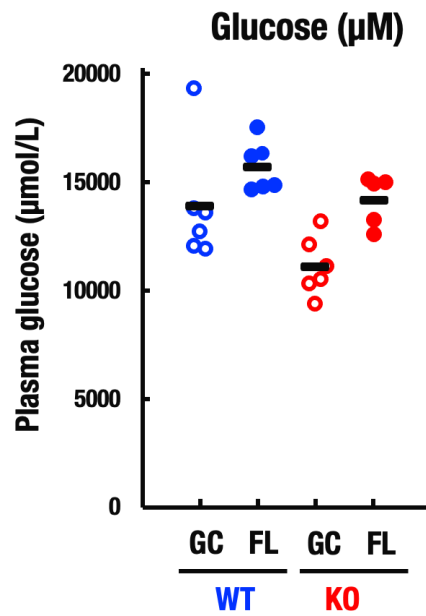

**Supplementary Figure 4.** Levels of plasma glucose from WT and Nrf2-KO mice in GC and FL groups. Data are presented as mean, and dots represent individual animals. n=6 for GC WT, FL WT and GC KO, and n=5 for FL KO.

## Supplementary Figure 5

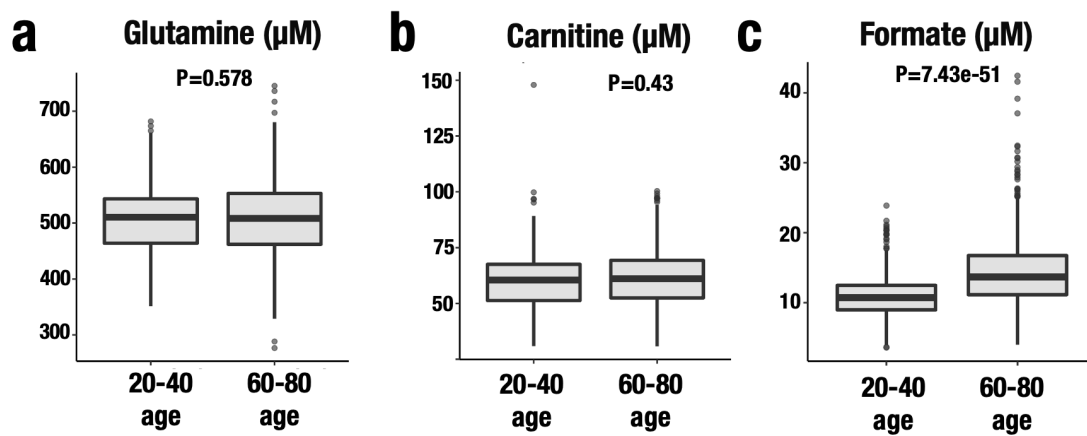

**Supplementary Figure 5.** Age-distribution of plasma levels of glutamine (**a**), carnitine (**b**) and formate (**c**) in a human cohort of the ToMMo study (data replotted from ref. 22). P values were calculated with Wilcoxon-Mann-Whitney test.  $n = 545$  (20-40 age) and  $955$  (60-80 age) for **a**.  $n = 472$  (20-40 age) and  $830$  (60-80 age) for **b**.  $n = 529$  (20-40 age) and  $955$  (60-80 age) for **c**.

## Supplementary Figure 6

**a** Down-regulated in aged mouse liver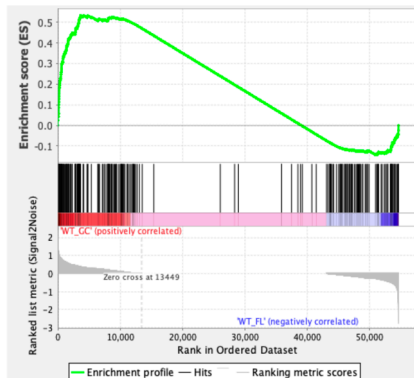

**Nominal  $p < 0.01$**   
**Enrichment score = 0.53**

**b** Down-regulated in aged mouse temporal bone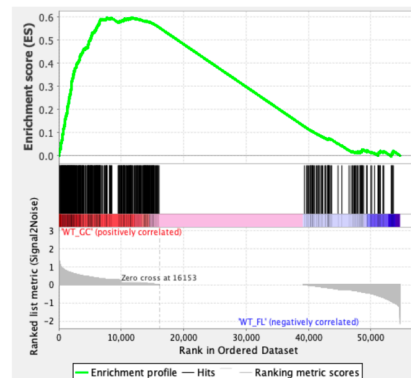

**Nominal  $p < 0.01$**   
**Enrichment score = 0.60**

**c** Down-regulated in aged mouse BAT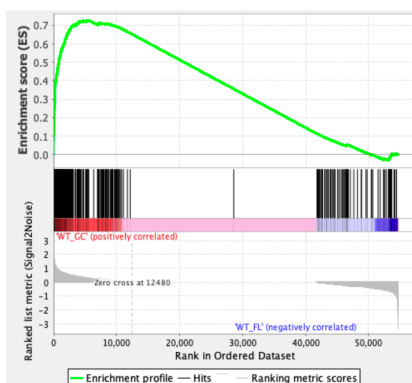

**Nominal  $p < 0.01$**   
**Enrichment score = 0.73**

**d** Up-regulated in aged mouse WAT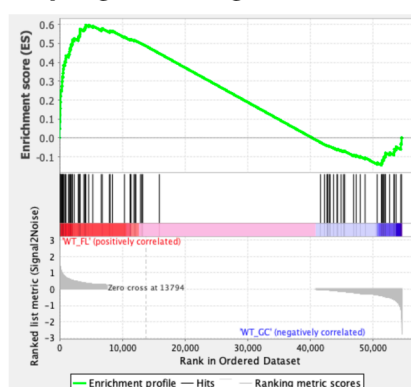

**Nominal  $p < 0.01$**   
**Enrichment score = 0.60**

Supplementary Figure 6. Gene set enrichment analyses (GSEA) of gene expression induced by space flight in liver (a), temporal bone (b), BAT (c) and WAT (d).

## Supplementary Figure 7

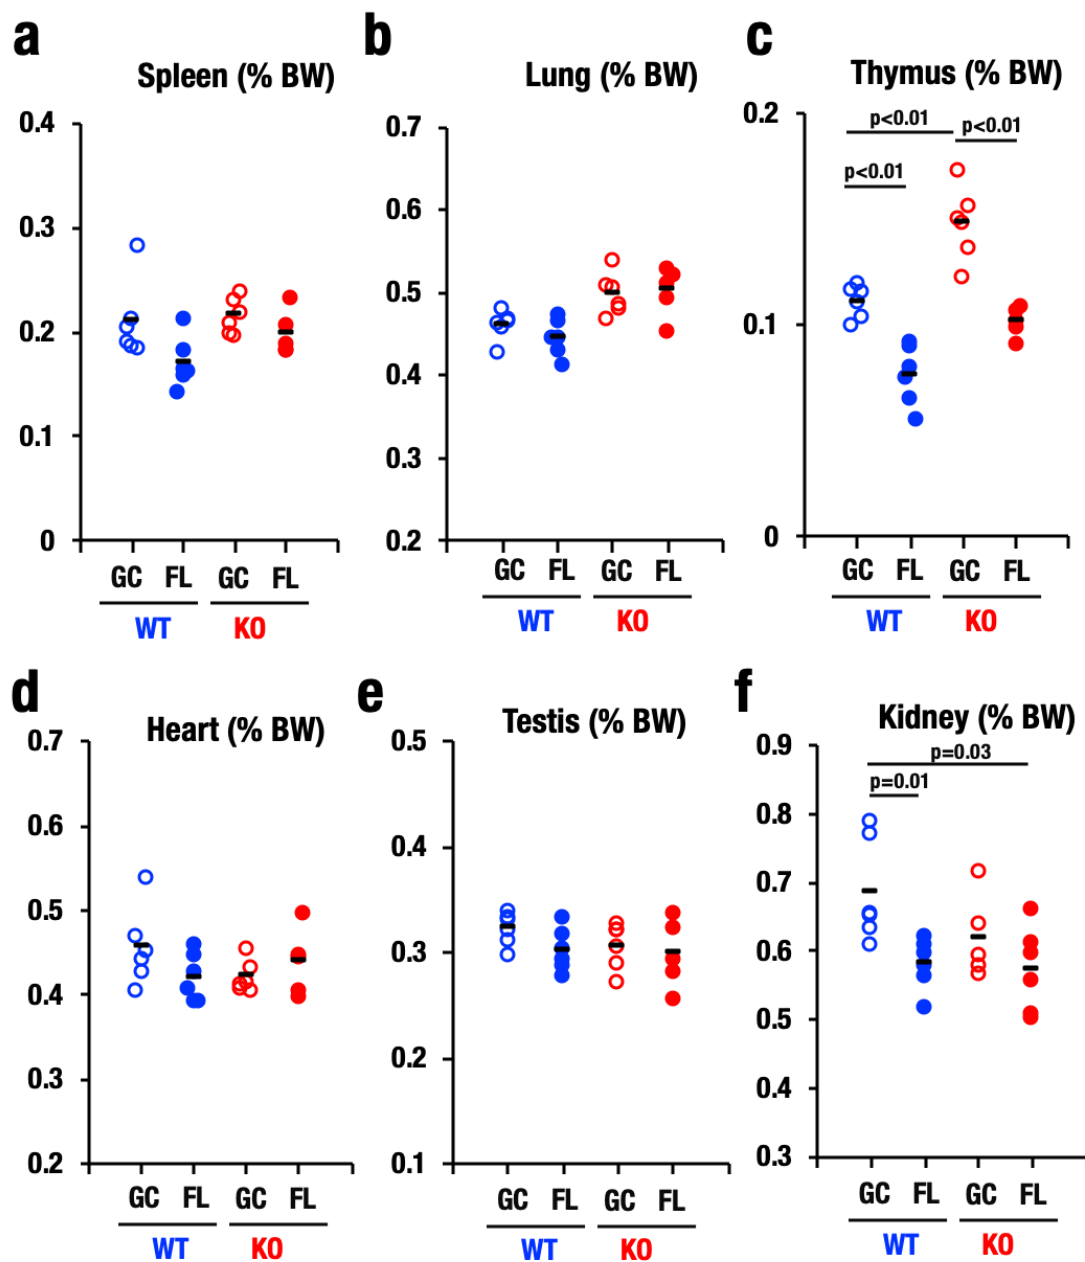

**Supplementary Figure 7.** (a-f) Body weight-normalized masses of spleen (a), lung (b), thymus (c), heart (d), testis (e), and kidney (f) in GC and FL groups. Data are presented as mean, and dots represent individual animals. n=6 for GC WT, FL WT and GC KO, and n=5 for FL KO. One-way ANOVA with Tukey-Kramer test.



## Supplementary Figure 8

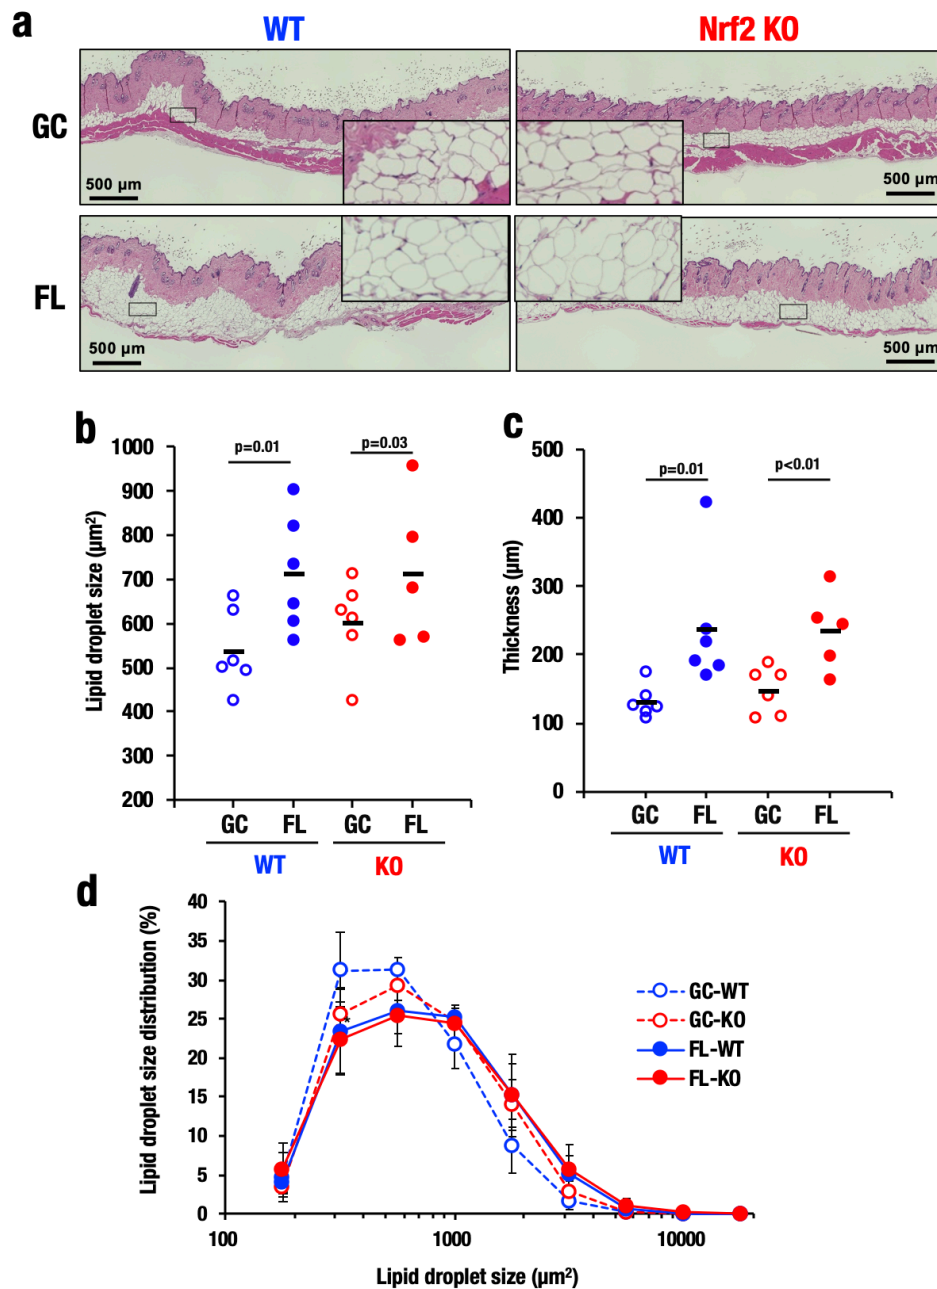

**Supplementary Figure 8.** (a) Histological images of skin from WT and Nrf2-KO mice in GC and FL groups. (b) Lipid droplet size of subcutaneous fat from WT and Nrf2-KO mice in GC and FL groups. (c) Thickness of subcutaneous fat from WT and Nrf2-KO mice in GC and FL groups. (d) Lipid droplet size distribution of subcutaneous fat from WT and Nrf2-KO mice in GC and FL groups. Data are presented as mean. Dots represent individual animals for **b** and **c**.  $n=6$  for GC WT, FL WT and GC KO, and  $n=5$  for FL KO. One-way ANOVA with Tukey-Kramer test.

### Supplementary Figure 9

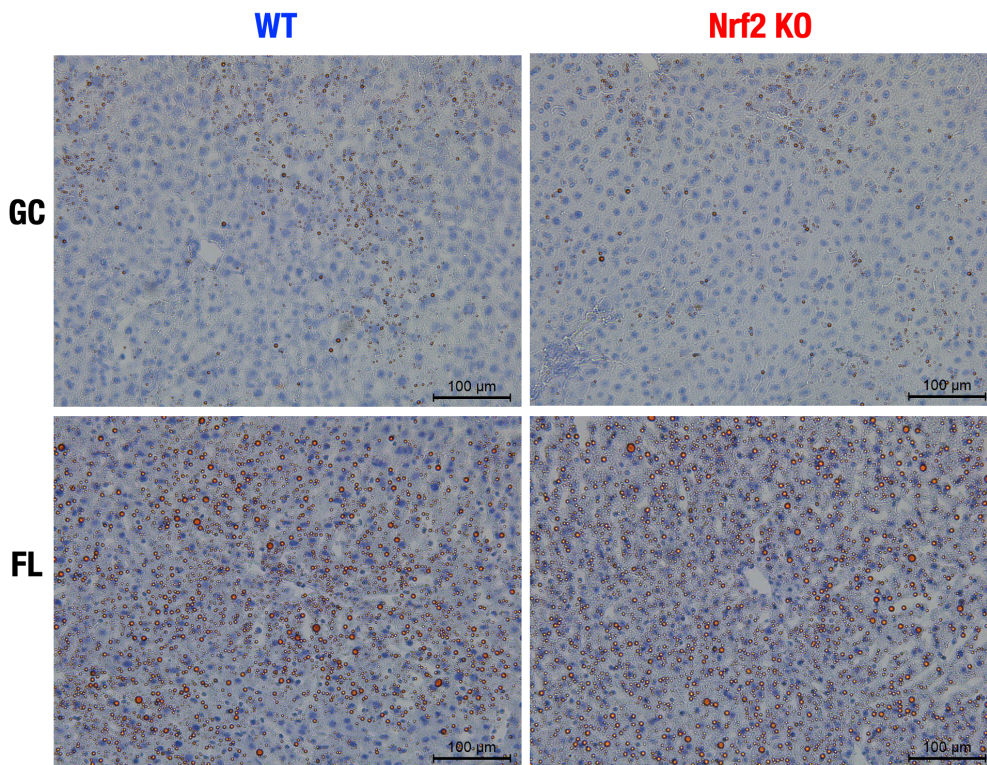

**Supplementary Figure 9.** Oil Red O staining images of liver from WT and Nrf2-KO mice in GC and FL groups.

## Supplementary Figure 10

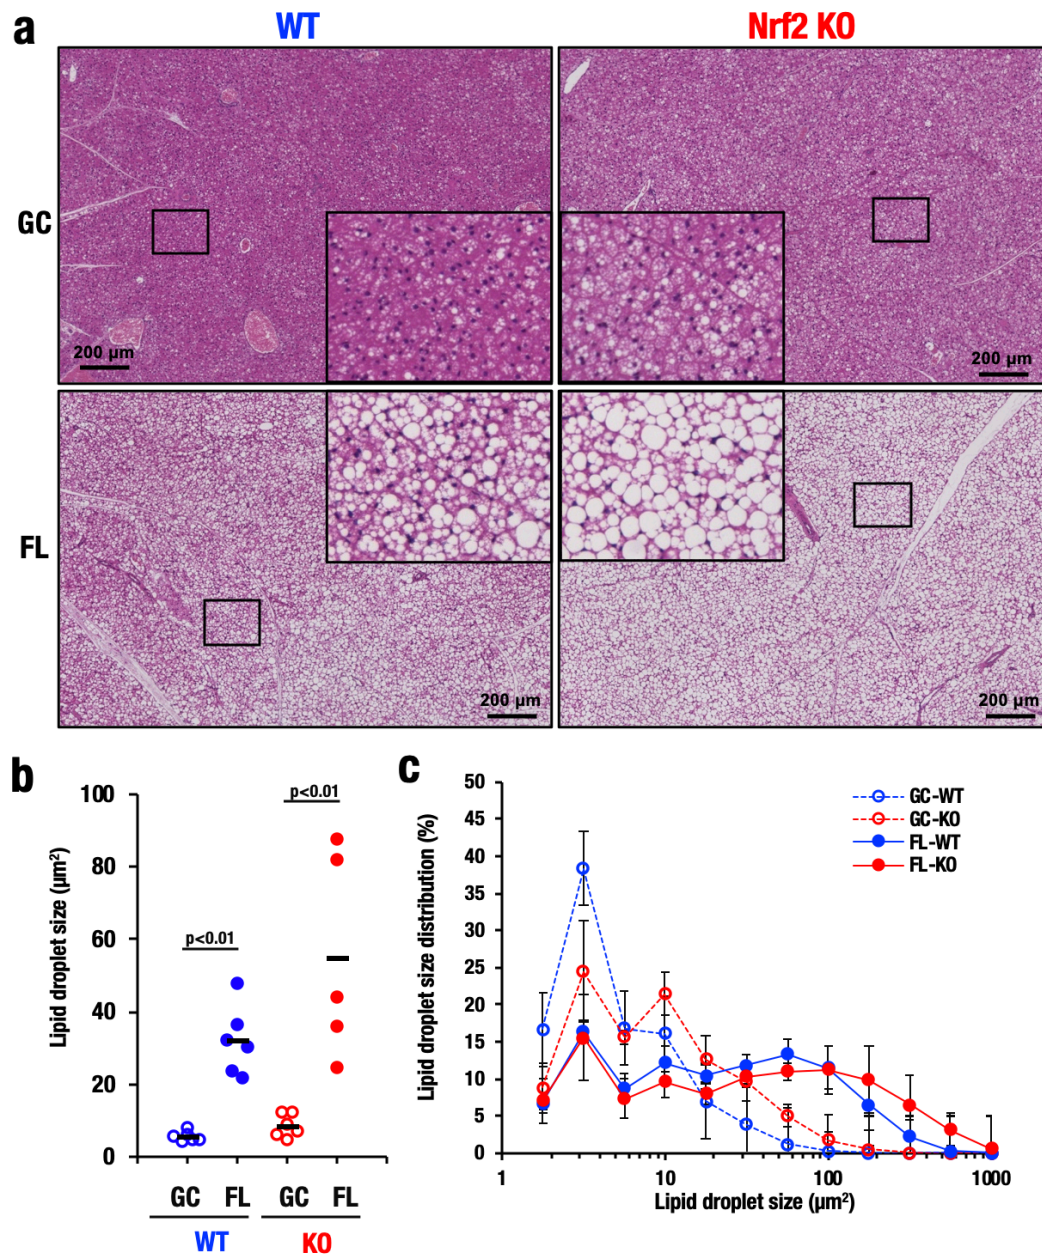

**Supplementary Figure 10.** (a) Histological images of iBAT from WT and Nrf2-KO mice in GC and FL groups. (b) Lipid droplet size of iBAT from WT and Nrf2-KO mice in GC and FL groups. Data are presented as mean, and dots represent individual animals. n=6 for GC WT, FL WT and GC KO, and n=5 for FL KO. One-way ANOVA with Tukey-Kramer test. (c) Lipid droplet size distribution of iBAT from WT and Nrf2-KO mice in GC and FL groups.



Supplementary Figure 11

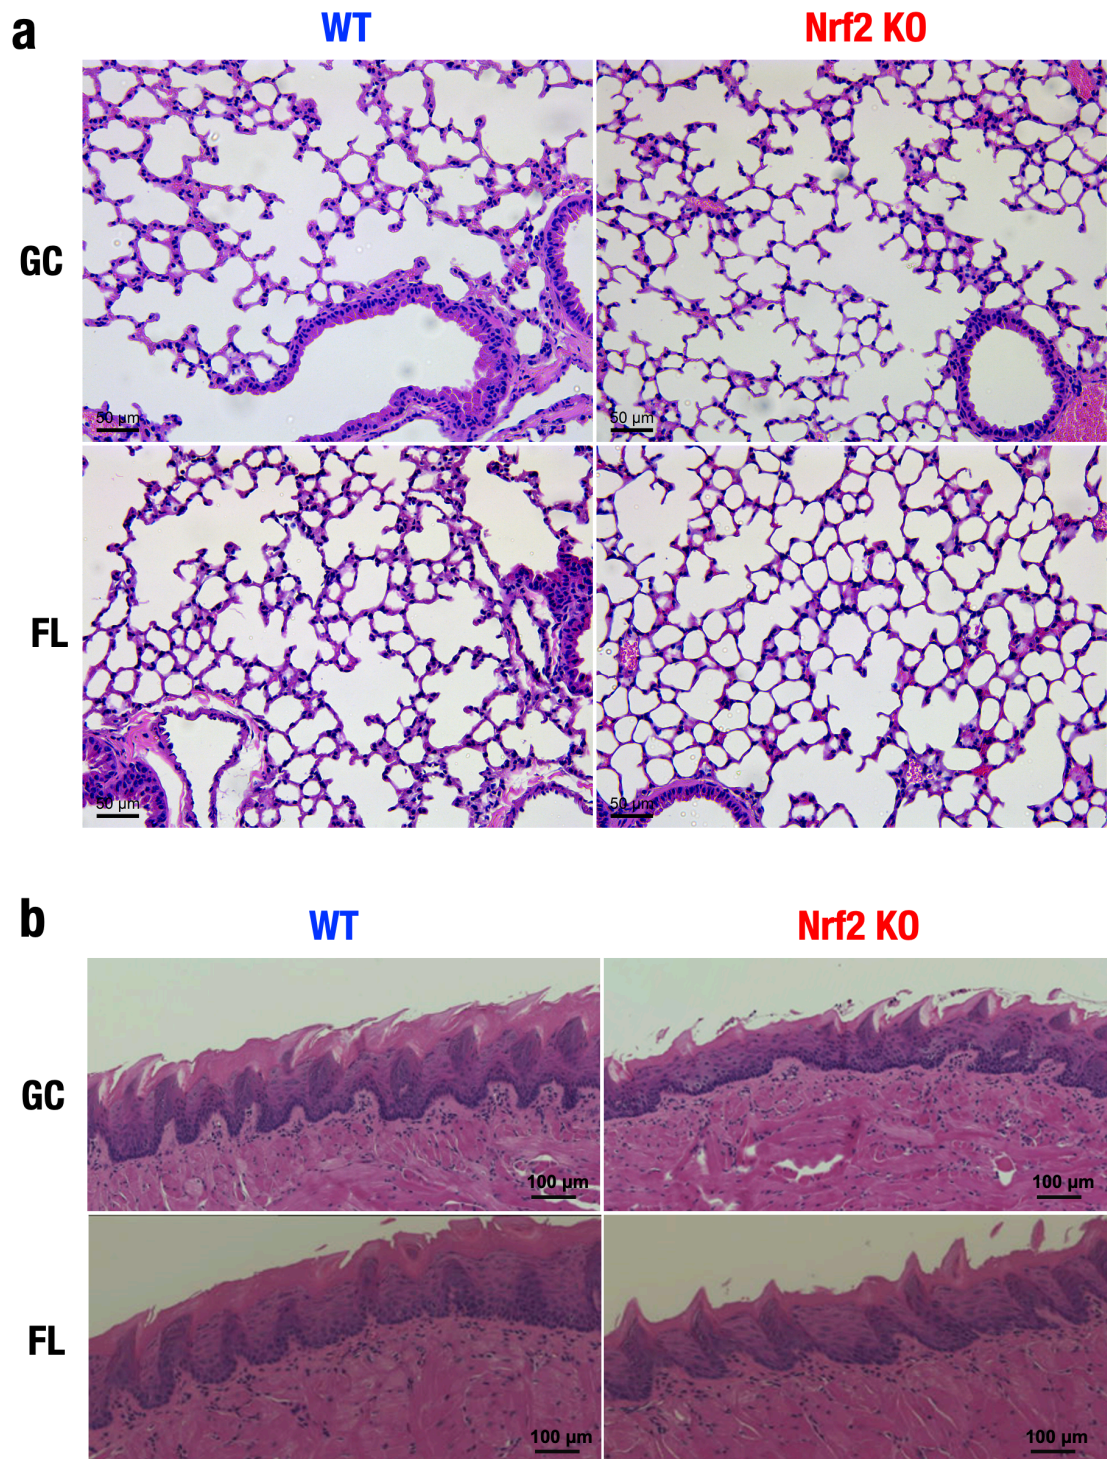

Supplementary Figure 11. Histological images of lung (a) and tongue (b) from WT and Nrf2-KO mice in GC and FL groups.

Supplementary Figure 12

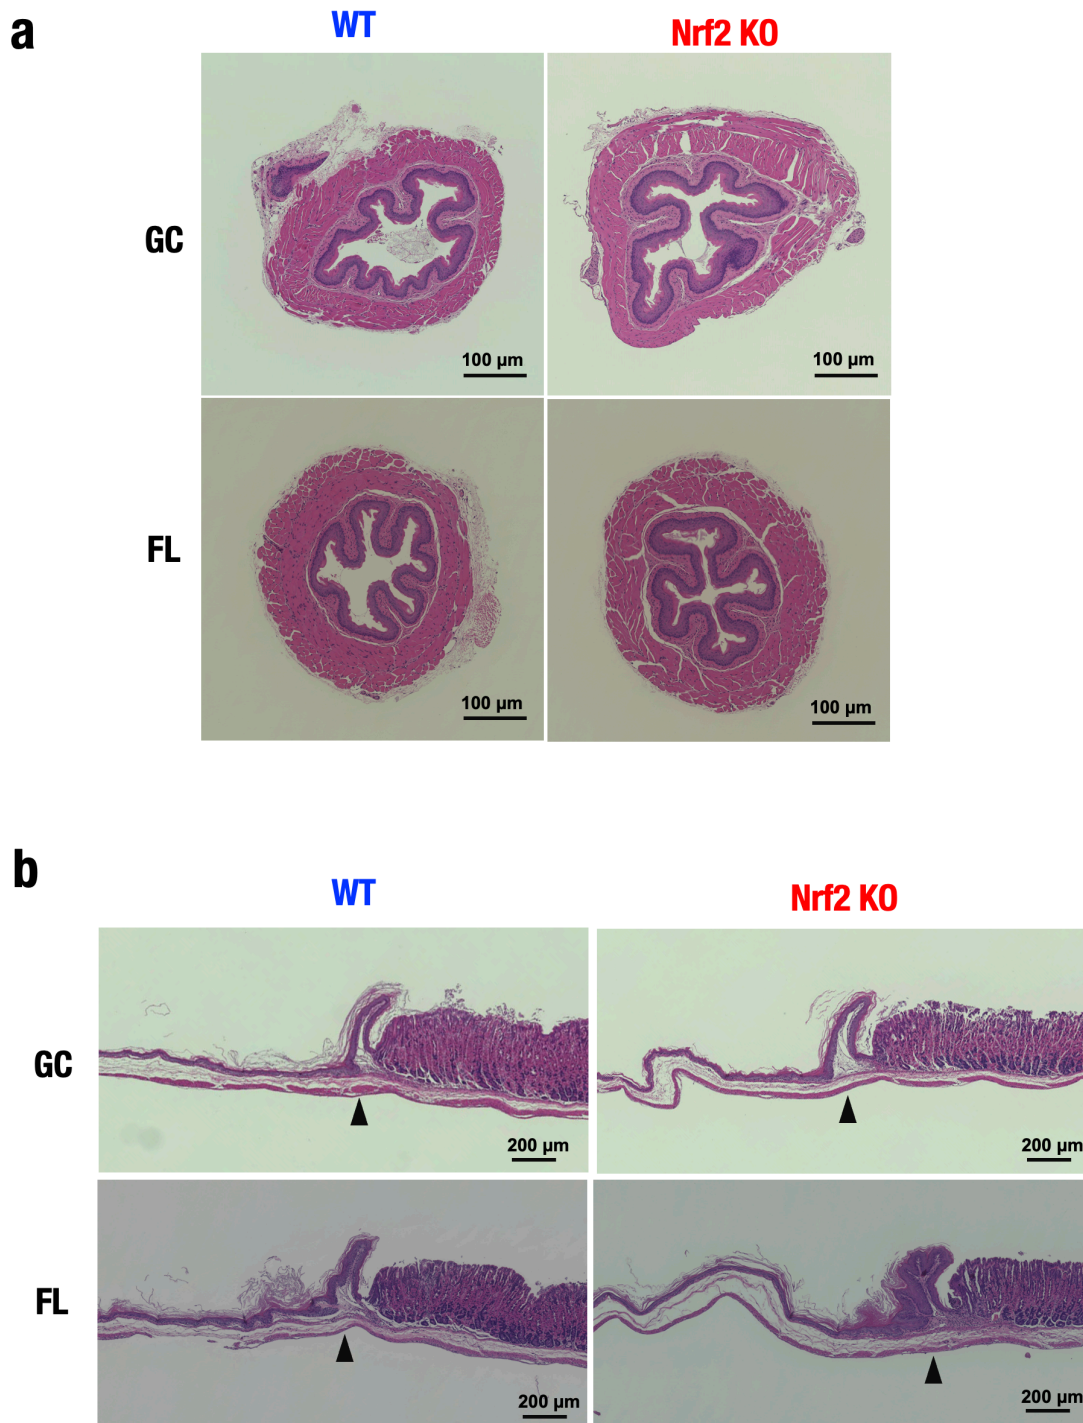

**Supplementary Figure 12.** Histological images of esophagus (a) and stomach (b) from WT and Nrf2-KO mice in GC and FL groups.



### Supplementary Figure 13

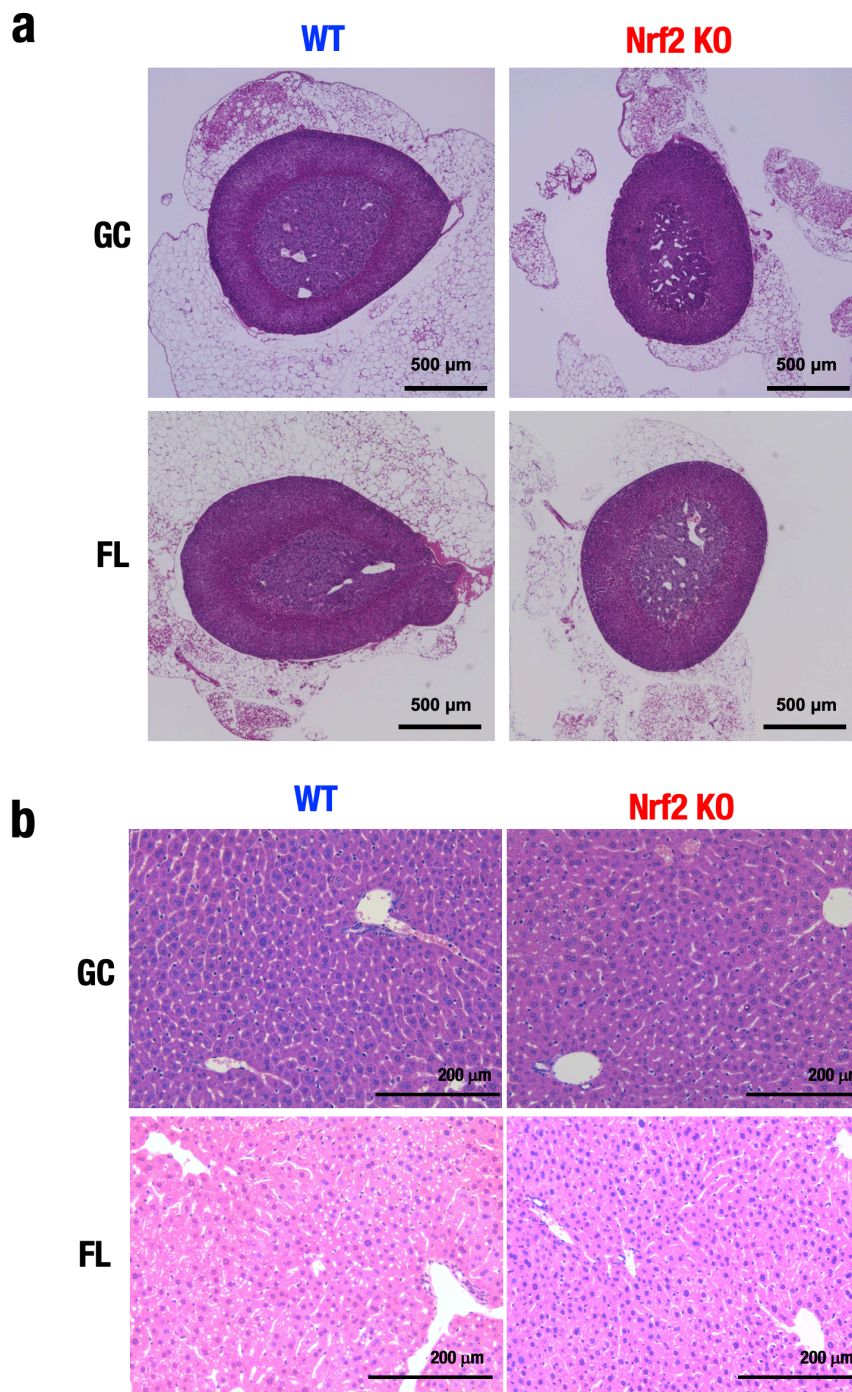

**Supplementary Figure 13.** Histological images of adrenal gland (a) and liver (b) from WT and Nrf2-KO mice in GC and FL groups.

Supplementary Figure 14

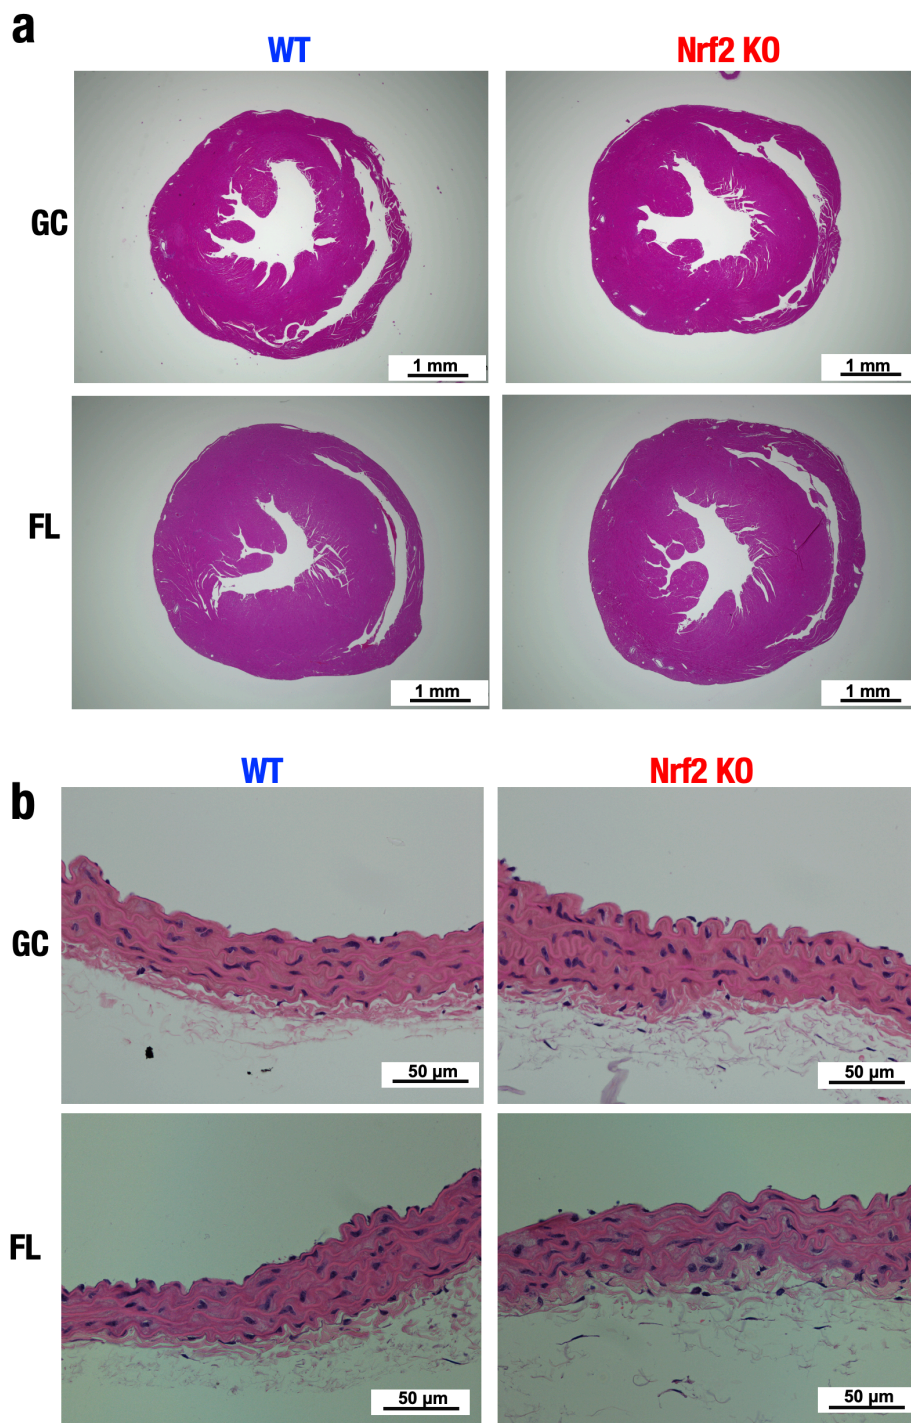

**Supplementary Figure 14.** Histological images of heart (a) and aorta (b) from WT and Nrf2-KO mice in GC and FL groups.
